# Supplementary material
Source: MDPI journal article supplement (https://www.mdpi.com/2077-1312/9/5/545)
Supplement: s1 [file s1]

Table S1. Tier 1 indicators and reference points for capture fisheries activities in the extended EBFA (employed from the previous EBFA[9,10]).

| Management Objective      | Driving force       | Indicator                                                                          | Reference points (Tier 1)                         |                                                                                   |                                                   |
|---------------------------|---------------------|------------------------------------------------------------------------------------|---------------------------------------------------|-----------------------------------------------------------------------------------|---------------------------------------------------|
|                           |                     |                                                                                    | Better than target                                | Between target and Limit                                                          | Beyond limit                                      |
|                           |                     |                                                                                    | 0~1                                               | 1<RS<2                                                                            | 2~3                                               |
| • Sustainability          | • Capture fisheries | • Biomass(B)<br>• or CPUE                                                          | $B_{MSY} \leq B$<br>$CPUE_{MSY} \leq CPUE$        | $1/2(B_{MSY}) \leq B < B_{MSY}$<br>$1/2(CPUE_{MSY}) \leq CPUE < CPUE_{MSY}$       | $B < 1/2(B_{MSY})$<br>$CPUE < 1/2(CPUE_{MSY})$    |
|                           |                     | • Catch<br>• or Fishing Mortality(F)                                               | $C \leq MSY$<br>$F \leq F_{MSY}$                  | $MSY < C \leq 2MSY$<br>$F_{MSY} < F \leq 2F_{MSY}$                                | $2MSY < C$<br>$2F_{MSY} < F$                      |
|                           |                     | • Age(or length) at first capture(t or L)                                          | $(t_{target} \leq t)$<br>or $(L_{target} \leq L)$ | $(0.9t_{target} \leq t < t_{target})$<br>or $(0.9L_{target} \leq L < L_{target})$ | $(t < 0.9t_{target})$<br>or $(L < 0.9L_{target})$ |
|                           |                     | • Rate of mature fish(MR)                                                          | $MR_{40\%} \leq MR$                               | $MR_{20\%} \leq MR < MR_{40\%}$                                                   | $MR < MR_{20\%}$                                  |
|                           |                     | • Ratio of(released stock abundance) /(wild stock abundance) in catch( $R_{r/w}$ ) | $R_{r/w} \leq 0.5$                                | $0.5 < R_{r/w} \leq 1.0$                                                          | $1.0 < R_{r/w}$                                   |
| • Habitat quality         |                     | • Critical habitat damage rate(DH/H)                                               | $(DH/H) \leq (DH/H)_{target}$                     | $(DH/H)_{target} < (DH/H) \leq (DH/H)_{limit}$                                    | $(DH/H) > (DH/H)_{limit}$                         |
|                           |                     | • Lost fishing gear(Frequency, FR)                                                 | $FR \leq FR_{target}$                             | $FR_{target} < FR \leq FR_{limit}$                                                | $FR > FR_{limit}$                                 |
|                           |                     | • Discard wastes rate(DW)                                                          | $DW \leq DW_{target}$                             | $DW_{target} < DW \leq DW_{limit}$                                                | $DW > DW_{limit}$                                 |
|                           |                     | • Pollution rate of spawning and nursery ground(PG/G)                              | $(PG/G) \leq (PG/G)_{target}$                     | $(PG/G)_{target} < (PG/G) \leq (PG/G)_{limit}$                                    | $(PG/G) > (PG/G)_{limit}$                         |
| • Biodiversity            |                     | • Bycatch rate(BC/C)                                                               | $(BC/C) \leq (BC/C)_{target}$                     | $(BC/C)_{target} < (BC/C) \leq (BC/C)_{limit}$                                    | $(BC/C) > (BC/C)_{limit}$                         |
|                           |                     | • Discard rate(D/C)                                                                | $(D/C) \leq (D/C)_{target}$                       | $(D/C)_{target} < (D/C) \leq (D/C)_{limit}$                                       | $(D/C) > (D/C)_{limit}$                           |
|                           |                     | • Diversity index(DI)                                                              | $(DI) \geq DI_{target}$                           | $DI_{target} > (DI) \geq DI_{limit}$                                              | $(DI) < DI_{limit}$                               |
| • Socio-economic benefits |                     | • Income per person employed(IPPE)                                                 | $IPPE \geq UIPPE$                                 | $LIPPE \leq IPPE < UIPPE$                                                         | $IPPE < LIPPE$                                    |
|                           |                     | • Ratio of profit to sales(RPS)                                                    | $RPS \geq URPS$                                   | $0\% \leq RPS < URPS$                                                             | $RPS < 0\%$                                       |
|                           |                     | • Employment rate(ER)                                                              | $ER \geq UER$                                     | $0.5UER \leq ER < UER$                                                            | $ER < 0.5UER$                                     |

Table S2. Tier 1 indicators and reference points for other driving forces in the extended EBFA.

| Management Objective | Driving force                  | Indicator                                                | Reference points (Tier 1)             |                                                               |                                   |
|----------------------|--------------------------------|----------------------------------------------------------|---------------------------------------|---------------------------------------------------------------|-----------------------------------|
|                      |                                |                                                          | Better than target                    | Between target and Limit                                      | Beyond limit                      |
|                      |                                |                                                          | 0~1                                   | 1<RS<2                                                        | 2~3                               |
| • Sustainability     | • Aquaculture                  | • Cultured / wild biomass ratio ( $R_{c/w}$ )            | $R_{c/w} \leq R_{c/w \text{ target}}$ | $R_{c/w \text{ target}} < R_{c/w} \leq R_{c/w \text{ limit}}$ | $R_{c/w \text{ limit}} < R_{c/w}$ |
|                      | • Leisure activities           | • Catch by leisure ( $C_L$ )                             | $C_L \leq C_L \text{ target}$         | $C_L \text{ target} < C_L \leq C_L \text{ limit}$             | $C_L \text{ limit} < C_L$         |
|                      |                                | • Catch by tideland education ( $C_T$ )                  | $C_T \leq C_T \text{ target}$         | $C_T \text{ target} < C_T \leq C_T \text{ limit}$             | $C_T \text{ limit} < C_T$         |
|                      | • Accident and disaster        | • Predation by jellyfish ( $P_J$ )                       | $P_J \leq P_J \text{ target}$         | $P_J \text{ target} < P_J \leq P_J \text{ limit}$             | $P_J \text{ limit} < P_J$         |
|                      |                                | • Predation by starfish ( $P_S$ )                        | $P_S \leq P_S \text{ target}$         | $P_S \text{ target} < P_S \leq P_S \text{ limit}$             | $P_S \text{ limit} < P_S$         |
|                      |                                | • Deaths by eutrophication (DA)                          | $AD \leq AD_{\text{target}}$          | $AD_{\text{target}} < AD \leq AD_{\text{limit}}$              | $AD_{\text{limit}} < AD$          |
|                      |                                | • Deaths by oil pollution (DO)                           | $AD \leq AD_{\text{target}}$          | $AD_{\text{target}} < AD \leq AD_{\text{limit}}$              | $AD_{\text{limit}} < AD$          |
|                      | • Stock enhancement activities | • Biomass enhancement by fries or juveniles release (BE) | $BE \geq BE_{\text{target}}$          | $BE_{\text{limit}} \leq BE < BE_{\text{target}}$              | $BE < BE_{\text{limit}}$          |
| • Habitat quality    | • Aquaculture                  | • Fish waste ( $W_F$ )                                   | $W_F \leq W_F \text{ target}$         | $W_F \text{ target} < W_F \leq W_F \text{ limit}$             | $W_F \text{ limit} < W_F$         |
|                      |                                | • Aquaculture debris (AD)                                | $AD \leq AD_{\text{target}}$          | $AD_{\text{target}} < AD \leq AD_{\text{limit}}$              | $AD_{\text{limit}} < AD$          |
|                      |                                | • Fish food waste (FW)                                   | $FW \leq FW_{\text{target}}$          | $FW_{\text{target}} < FW \leq FW_{\text{limit}}$              | $FW_{\text{limit}} < FW$          |
|                      |                                | • Water circulation (WC)                                 | $WC \leq WC_{\text{target}}$          | $WC_{\text{target}} < WC \leq WC_{\text{limit}}$              | $WC_{\text{limit}} < WC$          |
|                      | • Land-based pollution         | • Domestic sewage (DS)                                   | $DS \leq DS_{\text{target}}$          | $DS_{\text{target}} < DS \leq DS_{\text{limit}}$              | $DS_{\text{limit}} < DS$          |
|                      |                                | • Domestic excreta (DE)                                  | $DE \leq DE_{\text{target}}$          | $DE_{\text{target}} < DE \leq DE_{\text{limit}}$              | $DE_{\text{limit}} < DE$          |
|                      |                                | • Industrial sewage (IS)                                 | $IS \leq IS_{\text{target}}$          | $IS_{\text{target}} < IS \leq IS_{\text{limit}}$              | $IS_{\text{limit}} < IS$          |
|                      |                                | • Industrial organic matter (IO)                         | $IO \leq IO_{\text{target}}$          | $IO_{\text{target}} < IO \leq IO_{\text{limit}}$              | $IO_{\text{limit}} < IO$          |
|                      |                                | • Industrial heated effluent (IH)                        | $IH \leq IH_{\text{target}}$          | $IH_{\text{target}} < IH \leq IH_{\text{limit}}$              | $IH_{\text{limit}} < IH$          |
|                      | • Construction activities      | • Waste by construction ( $W_C$ )                        | $W_C \leq W_C \text{ target}$         | $W_C \text{ target} < W_C \leq W_C \text{ limit}$             | $W_C \text{ limit} < W_C$         |
|                      |                                | • Seabed-sand collection (SC)                            | $SC \leq SC_{\text{target}}$          | $SC_{\text{target}} < SC \leq SC_{\text{limit}}$              | $SC_{\text{limit}} < SC$          |
|                      |                                | • Shoreline change by reclamation ( $SC_r$ )             | $SC_r \leq SC_r \text{ target}$       | $SC_r \text{ target} < SC_r \leq SC_r \text{ limit}$          | $SC_r \text{ limit} < SC_r$       |
|                      |                                | • Sediment inflow by reclamation (SI)                    | $SI \leq SI_{\text{target}}$          | $SI_{\text{target}} < SI \leq SI_{\text{limit}}$              | $SI_{\text{limit}} < SI$          |
|                      | • Leisure activities           | • Waste by leisure activities ( $W_L$ )                  | $W_L \leq W_L \text{ target}$         | $W_L \text{ target} < W_L \leq W_L \text{ limit}$             | $W_L \text{ limit} < W_L$         |

|                           |                                |                                                                             |                                   |                                                          |                               |
|---------------------------|--------------------------------|-----------------------------------------------------------------------------|-----------------------------------|----------------------------------------------------------|-------------------------------|
|                           |                                | • Heavy metal waste by leisure activities (HM)                              | $HM \leq HM_{\text{target}}$      | $HM_{\text{target}} < HM \leq HM_{\text{limit}}$         | $HM_{\text{limit}} < HM$      |
|                           |                                | • Habitat physical damage by leisure activities (HD <sub>L</sub> )          | $HD_L \leq HD_{L \text{ target}}$ | $HD_{L \text{ target}} < HD_L \leq HD_{L \text{ limit}}$ | $HD_{L \text{ limit}} < HD_L$ |
|                           |                                | • Tideland habitat physical damage by tideland education (HD <sub>T</sub> ) | $HD_T \leq HD_{T \text{ target}}$ | $HD_{T \text{ target}} < HD_T \leq HD_{T \text{ limit}}$ | $HD_{T \text{ limit}} < HD_T$ |
|                           | • Accident and disaster        | • Global warming by climate change (GW)                                     | $GW \leq GW_{\text{target}}$      | $GW_{\text{target}} < GW \leq GW_{\text{limit}}$         | $GW_{\text{limit}} < GW$      |
|                           |                                | • Ocean acidification by climate change (OA)                                | $RT \leq RT_{\text{target}}$      | $RT_{\text{target}} < RT \leq RT_{\text{limit}}$         | $RT_{\text{limit}} < RT$      |
|                           |                                | • Eutrophication(red tide occurrence) (RT)                                  | $RT \leq RT_{\text{target}}$      | $RT_{\text{target}} < RT \leq RT_{\text{limit}}$         | $RT_{\text{limit}} < RT$      |
|                           |                                | • Whitening event (WE)                                                      | $WE \leq WE_{\text{target}}$      | $WE_{\text{target}} < WE \leq WE_{\text{limit}}$         | $WE_{\text{limit}} < WE$      |
|                           |                                | • Water runoff by storm (WR)                                                | $WR \leq WR_{\text{target}}$      | $WR_{\text{target}} < WR \leq WR_{\text{limit}}$         | $WR_{\text{limit}} < WR$      |
|                           |                                | • Oil pollution by ship accident (OP)                                       | $OP \leq OP_{\text{target}}$      | $OP_{\text{target}} < OP \leq OP_{\text{limit}}$         | $OP_{\text{limit}} < OP$      |
|                           |                                | • Oxygen deficient event (OD)                                               | $OD \leq OD_{\text{target}}$      | $OD_{\text{target}} < OD \leq OD_{\text{limit}}$         | $OD_{\text{limit}} < OD$      |
|                           |                                | • Typhoon event (TE)                                                        | $TE \leq TE_{\text{target}}$      | $TE_{\text{target}} < TE \leq TE_{\text{limit}}$         | $TE_{\text{limit}} < TE$      |
|                           | • Stock enhancement activities | • Artificial reefs deployment (AR)                                          | $AR \geq AR_{\text{target}}$      | $AR_{\text{limit}} \leq AR < AR_{\text{target}}$         | $AR < AR_{\text{limit}}$      |
| • Biodiversity            | • Aquaculture                  | • Attracted wild fish by uneaten food (AF)                                  | $AF \leq AF_{\text{target}}$      | $AF_{\text{target}} < AF \leq AF_{\text{limit}}$         | $AF_{\text{limit}} < AF$      |
|                           |                                | • Escaped cultured species (E <sub>c</sub> )                                | $E_c \leq E_{c \text{ target}}$   | $E_{c \text{ target}} < E_c \leq E_{c \text{ limit}}$    | $E_{c \text{ limit}} < E_c$   |
|                           |                                | • Disease spread to wild fish (DS)                                          | $DS \leq DS_{\text{target}}$      | $DS_{\text{target}} < DS \leq DS_{\text{limit}}$         | $DS_{\text{limit}} < DS$      |
|                           | • Land-based pollution         | • Ballast water discharge (BD)                                              | $BD \leq BD_{\text{target}}$      | $BD_{\text{target}} < BD \leq BD_{\text{limit}}$         | $BD_{\text{limit}} < JB$      |
|                           | • Accident and disaster        | • Jellyfish bloom (JB)                                                      | $JB \leq JB_{\text{target}}$      | $JB_{\text{target}} < JB \leq JB_{\text{limit}}$         | $JB_{\text{limit}} < JB$      |
|                           |                                | • Starfish bloom (SB)                                                       | $SB \leq SB_{\text{target}}$      | $SB_{\text{target}} < SB \leq SB_{\text{limit}}$         | $SB_{\text{limit}} < SB$      |
| • Socio-economic benefits | • Leisure activities           | • Extra income from supporting leisure activities (EI <sub>L</sub> )        | $EI_L \geq EI_{L \text{ target}}$ | $EI_{L \text{ limit}} \leq EI_L < EI_{L \text{ target}}$ | $EI_L < EI_{L \text{ limit}}$ |
|                           |                                | • Extra employment by leisure activities (EE <sub>L</sub> )                 | $EE_L \geq EE_{L \text{ target}}$ | $EE_{L \text{ limit}} \leq EE_L < EE_{L \text{ target}}$ | $EE_L < EE_{L \text{ limit}}$ |
|                           | • Accidents and disasters      | • Fishing gear damage or ship damage by accident or disaster (FD)           | $FD \leq FD_{\text{target}}$      | $FD_{\text{target}} < FD \leq FD_{\text{limit}}$         | $FD_{\text{limit}} < FD$      |

Table S3. Tier 2 indicators and reference points for capture fisheries activities in the extended EBFA (employed from the previous EBFA[9,10]).

| Management Objective | Driving force       | Indicator                                                                         | Reference points (Tier 2)                                                                                                                    |                                                                                                                                |                                                                                                                                                                                                                                                                                              |                                                                                                                                                                                                             |                                                                                                                                          |                                                                                                                                                                            |                                                                                                                                                                                       |
|----------------------|---------------------|-----------------------------------------------------------------------------------|----------------------------------------------------------------------------------------------------------------------------------------------|--------------------------------------------------------------------------------------------------------------------------------|----------------------------------------------------------------------------------------------------------------------------------------------------------------------------------------------------------------------------------------------------------------------------------------------|-------------------------------------------------------------------------------------------------------------------------------------------------------------------------------------------------------------|------------------------------------------------------------------------------------------------------------------------------------------|----------------------------------------------------------------------------------------------------------------------------------------------------------------------------|---------------------------------------------------------------------------------------------------------------------------------------------------------------------------------------|
|                      |                     |                                                                                   | Better than target                                                                                                                           |                                                                                                                                | Between target and limit                                                                                                                                                                                                                                                                     |                                                                                                                                                                                                             |                                                                                                                                          | Beyond limit                                                                                                                                                               |                                                                                                                                                                                       |
|                      |                     |                                                                                   | 0                                                                                                                                            | 0.5                                                                                                                            | 1.0                                                                                                                                                                                                                                                                                          | 1.5                                                                                                                                                                                                         | 2.0                                                                                                                                      | 2.5                                                                                                                                                                        | 3.0                                                                                                                                                                                   |
| • Sustainability     | • Capture fisheries | <ul style="list-style-type: none"> <li>• Biomass(B)</li> <li>• or CPUE</li> </ul> | <p>More than x years of CPUE data are available</p> <p>Current CPUE are extremely large compared with average of CPUE during X years</p>     | <p>More than x years of CPUE data are available</p> <p>Current CPUE are large compared with average of CPUE during X years</p> | <p>More than X years of CPUE data are available</p> <p>Current CPUE are moderately large compare with average of CPUE during X years</p> <p>or</p> <p>Less than X years of CPUE data are available</p> <p>Current CPUE are moderately large compared with average of CPUE during X years</p> | <p>Less than X years of CPUE data are available</p> <p>CPUE is unchanged</p> <p>or</p> <p>Less than X years of CPUE data are available</p> <p>Current CPUE is similar to average of CPUE during X years</p> | <p>Less than X years of CPUE data are available</p> <p>Current CPUE is moderately small compared with average of CPUE during X years</p> | <p>CPUE data are not available, catch trend is unchanged</p> <p>or</p> <p>CPUE data are available, Current CPUE are small compared with average of CPUE during X years</p> | <p>CPUE data are not available, catch trend is declining</p> <p>or,</p> <p>CPUE data are available, Current CPUE are extremely small compared with average of CPUE during X years</p> |
|                      |                     | <ul style="list-style-type: none"> <li>• Catch or Fishing Mortality(F)</li> </ul> | <p>Effort is extremely small compared with average of effort during X years</p> <p>fisheries management and active self-regulation exist</p> | <p>Effort is small compared with average of effort during X years</p> <p>fisheries management or self-regulation exist</p>     | <p>Effort is moderately small compared with average of effort during X years</p> <p>fisheries management or self-regulation exist partly</p>                                                                                                                                                 | <p>Effort is similar to average of effort during X years</p>                                                                                                                                                | <p>Effort is moderately large compared with average of effort during X years</p>                                                         | <p>Number of license or fishing gear is unchanged</p> <p>or</p> <p>Effort is in an increasing state</p> <p>or</p> <p>IUU fisheries exist partly</p>                        | <p>Number of license or fishing gear is excessive</p> <p>or</p> <p>Effort is rapidly increasing</p> <p>or</p> <p>IUU fisheries exist largely</p>                                      |

|  |  |                                                                                                                |                                                                                                                                                       |                                                                                                                                              |                                                                                                                                                                                                                    |                                                                                                                                                                                                            |                                                                                                                                                                                                                                              |                                                                                                                                                                                                                                      |
|--|--|----------------------------------------------------------------------------------------------------------------|-------------------------------------------------------------------------------------------------------------------------------------------------------|----------------------------------------------------------------------------------------------------------------------------------------------|--------------------------------------------------------------------------------------------------------------------------------------------------------------------------------------------------------------------|------------------------------------------------------------------------------------------------------------------------------------------------------------------------------------------------------------|----------------------------------------------------------------------------------------------------------------------------------------------------------------------------------------------------------------------------------------------|--------------------------------------------------------------------------------------------------------------------------------------------------------------------------------------------------------------------------------------|
|  |  | <ul style="list-style-type: none"> <li>• Age(or length) at first capture(t or L)</li> </ul>                    | Length at first capture is extremely large compared with mature length                                                                                | Length at first capture is large compared with mature length<br>or<br>Average length of catch is extremely large compared with mature length | Length at first capture is moderately large compared with mature length<br>or<br>Average length of catch is large compared with mature length<br>or<br>Institutional prohibition length is established and managed | Length at first capture is similar to mature length<br>or<br>Average length of catch is moderately large compared with mature length<br>or<br>Self-regulated prohibition length is established and managed | Length at first capture is moderately small compared with mature length<br>or<br>Average length of catch is similar to mature length<br>or<br>Prohibition length is establish but length at first capture is smaller than prohibition length | Length at first capture is small compared with mature length<br>or<br>Average length of catch is moderately small compared with mature length<br>or<br>Length at first capture is not available, prohibition length is not establish |
|  |  | <ul style="list-style-type: none"> <li>• Rate of mature fish(MR)</li> </ul>                                    | Fishing never occurs during the spawning season<br>or<br>Prohibition season(prohibition fishing ground) is set up and conduct to conserve mature fish | No more than a minor amount of the catch is taken during the spawning season                                                                 | No more than a moderate amount of the catch is allowed to be harvested during the spawning season                                                                                                                  | No more than a moderate to a considerable amount of fish is allowed to be taken during the spawning season                                                                                                 | A significant amount of catch is allowed to be taken during the spawning season                                                                                                                                                              | A significant to most of the fisheries place during the spawning season                                                                                                                                                              |
|  |  | <ul style="list-style-type: none"> <li>• Ratio of(released stock abundance) /(wild stock abundance)</li> </ul> | Never release fish in the area<br><br>(There is no entrance from external area)                                                                       | A few release fish in the area                                                                                                               | Release conducted once and small amount in recent X year ( X = generation                                                                                                                                          | Release conducted twice in recent X year ( X = generation period – age at                                                                                                                                  | Release conducted three times and considerable amount in recent X year                                                                                                                                                                       | Release conducted more than four times and considerable amount in                                                                                                                                                                    |
|  |  |                                                                                                                |                                                                                                                                                       |                                                                                                                                              |                                                                                                                                                                                                                    |                                                                                                                                                                                                            |                                                                                                                                                                                                                                              |                                                                                                                                                                                                                                      |

|                       |                        | in<br>catch( $R_{r/w}$ )                      |                                                                                                                                                                                                                                                                                                                                                                   |                                                                                                                                                                                                                                                                                                                                                                                                                                                                   | period – age at<br>release) on the<br>area                                                                                                                                                                                                                                                                                                                                                                            | release) on the<br>area                                                                                                                                                                                                                                                                                                                                               | (X = generation<br>period – age at<br>release) on the<br>area                                                                                                                                                                                                                                                                                                      | recent X year<br>(X = generation<br>period – age at<br>release) on the<br>area                                                                                                                                                                                                                                                                                                             |                                                                                                                                                                                          |
|-----------------------|------------------------|-----------------------------------------------|-------------------------------------------------------------------------------------------------------------------------------------------------------------------------------------------------------------------------------------------------------------------------------------------------------------------------------------------------------------------|-------------------------------------------------------------------------------------------------------------------------------------------------------------------------------------------------------------------------------------------------------------------------------------------------------------------------------------------------------------------------------------------------------------------------------------------------------------------|-----------------------------------------------------------------------------------------------------------------------------------------------------------------------------------------------------------------------------------------------------------------------------------------------------------------------------------------------------------------------------------------------------------------------|-----------------------------------------------------------------------------------------------------------------------------------------------------------------------------------------------------------------------------------------------------------------------------------------------------------------------------------------------------------------------|--------------------------------------------------------------------------------------------------------------------------------------------------------------------------------------------------------------------------------------------------------------------------------------------------------------------------------------------------------------------|--------------------------------------------------------------------------------------------------------------------------------------------------------------------------------------------------------------------------------------------------------------------------------------------------------------------------------------------------------------------------------------------|------------------------------------------------------------------------------------------------------------------------------------------------------------------------------------------|
| • Habitats<br>quality | • Capture<br>fisheries | • Critical<br>habitat<br>damage<br>rate(DH/H) | Fishing gear<br>that has<br>extremely<br>small impact<br>on the habitat<br>(Purse seine,<br>Midwater trawl<br>etc.)<br><br>or<br><br>Fishing gear<br>that has small<br>impact on the<br>habitat<br>(Surface gillnet,<br>anchovy tow<br>net, boat seine,<br>jigging, pole<br>and line, lift net<br>etc.)<br><br>Operating<br>period of<br>fishing gear is<br>short | Fishing gear<br>that has small<br>impact on the<br>habitat<br>(Surface gillnet,<br>anchovy tow<br>net, boat seine,<br>jigging, pole<br>and line, lift net<br>etc.)<br><br>Operating<br>period of<br>fishing gear is<br>very long<br><br>or<br><br>Fishing gear<br>that has<br>moderately<br>small impact<br>on the habitat<br>(Stow net,<br>swing net on<br>stakes, long<br>bag set net,<br>setnet etc.)<br><br>Operating<br>period of<br>fishing gear is<br>long | Fishing gear<br>that has<br>moderately<br>small impact<br>on the habitat<br>(Stow net,<br>swing net on<br>stakes, long<br>bag set net,<br>setnet etc.)<br><br>Operating<br>period of<br>fishing gear is<br>very long<br><br>or<br><br>Fishing gear<br>that has<br>average impact<br>on the habitat<br>(bottom<br>longline,<br>bottom drift<br>gill net etc.)<br><br>Operating<br>period of<br>fishing gear is<br>long | Fishing gear<br>that has<br>average impact<br>on the habitat<br>(bottom<br>longline,<br>bottom drift<br>gill net)<br><br>Operating<br>period of<br>fishing gear is<br>very long<br><br>or<br><br>Fishing gear<br>that has<br>moderately<br>large impact on<br>the habitat<br>(Trap, bottom<br>gill net etc.)<br><br>Operating<br>period of<br>fishing gear is<br>long | Fishing gear<br>that has<br>moderately<br>large impact on<br>the habitat<br>(Trap, bottom<br>gill net etc.)<br><br>Operating<br>period of<br>fishing gear is<br>very long<br><br>or<br><br>Fishing gear<br>that has large<br>impact on the<br>habitat (Beam-<br>trawl, Danish<br>seine, haul net<br>etc.)<br><br>Operating<br>period of<br>fishing gear is<br>long | Fishing gear<br>that has large<br>impact on the<br>habitat (Beam-<br>trawl, Danish<br>seine, haul net<br>etc.)<br><br>Operating<br>period of<br>fishing gear is<br>very long<br><br>or<br><br>Fishing gear<br>that has<br>extremely large<br>impact on the<br>habitat<br>(Bottom trawl,<br>dredge, spray<br>fishing gear<br>etc.)<br><br>Operating<br>period of<br>fishing gear is<br>long | Fishing gear that<br>has extremely<br>large impact on<br>the habitat<br>(Bottom trawl,<br>dredge, spray<br>fishing gear etc.)<br><br>Operating period<br>of fishing gear is<br>very long |
|                       |                        | • Lost fishing<br>gear(Freque<br>ncy, FR)     | Possibility for<br>potential loss<br>of fishing gear<br>is high degree<br>of uncertainty                                                                                                                                                                                                                                                                          | Possibility for<br>potential loss<br>of fishing gear<br>is highly<br>unlikely                                                                                                                                                                                                                                                                                                                                                                                     | Possibility for<br>potential loss<br>of fishing gear<br>is unlikely<br><br>Setting period<br>of fishing gear                                                                                                                                                                                                                                                                                                          | Possibility for<br>potential loss<br>of fishing gear<br>is ambiguous                                                                                                                                                                                                                                                                                                  | Possibility for<br>potential loss<br>of fishing gear<br>is likely<br><br>Setting period<br>of fishing gear                                                                                                                                                                                                                                                         | Possibility for<br>potential loss<br>of fishing gear<br>is highly likely                                                                                                                                                                                                                                                                                                                   | Possibility for<br>potential loss of<br>fishing gear is<br>high degree of<br>certainty                                                                                                   |

|                |                     |                                                       |                                                                                                                                                                                                                                 |                                                                                                                                                                                                      |                                                                                                                                                                                                     |                                                                                                                                                                                                             |                                                                                                                                                                                                     |                                                                                                                                                                                        |                                                                                                                                                                                      |
|----------------|---------------------|-------------------------------------------------------|---------------------------------------------------------------------------------------------------------------------------------------------------------------------------------------------------------------------------------|------------------------------------------------------------------------------------------------------------------------------------------------------------------------------------------------------|-----------------------------------------------------------------------------------------------------------------------------------------------------------------------------------------------------|-------------------------------------------------------------------------------------------------------------------------------------------------------------------------------------------------------------|-----------------------------------------------------------------------------------------------------------------------------------------------------------------------------------------------------|----------------------------------------------------------------------------------------------------------------------------------------------------------------------------------------|--------------------------------------------------------------------------------------------------------------------------------------------------------------------------------------|
|                |                     |                                                       | Setting period of fishing gear is extremely short                                                                                                                                                                               | Setting period of fishing gear is short                                                                                                                                                              | is moderately short                                                                                                                                                                                 | Setting period of fishing gear is average                                                                                                                                                                   | is moderately long                                                                                                                                                                                  | Setting period of fishing gear is long                                                                                                                                                 | Setting period of fishing gear is extremely long<br>Discarded waste is extremely large<br><br>or<br>Fatal fishing wastes is being discarded                                          |
|                |                     | • Discard wastes rate(DW)                             | Discarded waste is extremely small                                                                                                                                                                                              | Discarded waste is small                                                                                                                                                                             | Discarded waste is moderately small                                                                                                                                                                 | Discarded waste is average                                                                                                                                                                                  | Discarded waste is moderately large                                                                                                                                                                 | Discarded waste is large                                                                                                                                                               | Discarded waste is extremely large<br><br>or<br>Fatal fishing wastes is being discarded                                                                                              |
|                |                     | • Pollution rate of spawning and nursery ground(PG/G) | There is information on the magnitude of pollution by the target fisheries on the spawning and nursery grounds,<br><br>no pollution by the target fisheries on the spawning and nursery grounds<br><br>no oil spillage accident | There is information on the magnitude of pollution by the target fisheries on the spawning and nursery ground and<br><br>a few pollution by the target fisheries on the spawning and nursery grounds | There is information on the magnitude of pollution by the target fisheries on the spawning and nursery ground and<br><br>some pollution by the target fisheries on the spawning and nursery grounds | There is information on the magnitude of pollution by the target fisheries on the spawning and nursery ground and<br><br>considerable pollution by the target fisheries on the spawning and nursery grounds | There is information on the magnitude of pollution by the target fisheries on the spawning and nursery ground and<br><br>much pollution by the target fisheries on the spawning and nursery grounds | There is no information on the magnitude of pollution by the target fisheries on the spawning and nursery ground and<br><br>existence of oil spillage accident within recent 3-5 years | There is no information on the magnitude of pollution by the target fisheries on the spawning and nursery ground and<br><br>existence of oil spillage accident within recent 3 years |
| • Biodiversity | • Capture fisheries | • Bycatch rate(BC/C)                                  | Bycatch never occurs compared with average of bycatch rate during X years                                                                                                                                                       | Current bycatch rate is extremely small compared with average of                                                                                                                                     | Current bycatch rate is small compared with average of bycatch rate during X years                                                                                                                  | Current bycatch rate is moderately small compared with average of                                                                                                                                           | Current bycatch rate is similar compared with average of bycatch rate during X years                                                                                                                | Current bycatch rate is moderately large compared with average of bycatch rate during X years                                                                                          | Current bycatch rate is large compared with average of bycatch rate during X years                                                                                                   |





|  |  |                       |                                                                                                                      |                                                                                                            |                                                                                                                       |                                                                                                              |                                                                                                                       |                                                                                                            |                                                                                                                      |
|--|--|-----------------------|----------------------------------------------------------------------------------------------------------------------|------------------------------------------------------------------------------------------------------------|-----------------------------------------------------------------------------------------------------------------------|--------------------------------------------------------------------------------------------------------------|-----------------------------------------------------------------------------------------------------------------------|------------------------------------------------------------------------------------------------------------|----------------------------------------------------------------------------------------------------------------------|
|  |  |                       | extremely large                                                                                                      | large                                                                                                      | moderately large                                                                                                      | average                                                                                                      | moderately small                                                                                                      | small                                                                                                      | extremely small                                                                                                      |
|  |  | • Employment rate(ER) | Index of fisheries employment (number of fishermen× number of fishing vessels) for recent X years is extremely large | Index of fisheries employment (number of fishermen× number of fishing vessels) for recent X years is large | Index of fisheries employment (number of fishermen× number of fishing vessels) for recent X years is moderately large | Index of fisheries employment (number of fishermen× number of fishing vessels) for recent X years is average | Index of fisheries employment (number of fishermen× number of fishing vessels) for recent X years is moderately small | Index of fisheries employment (number of fishermen× number of fishing vessels) for recent X years is small | Index of fisheries employment (number of fishermen× number of fishing vessels) for recent X years is extremely small |

Table S4. Tier 2 indicators and reference points for other driving forces in the extended EBFA.

| Management Objective | Driving force           | Indicator                       | Reference points (Tier 2)                               |                                               |                                                          |                                           |                                                 |                                              |                                                |
|----------------------|-------------------------|---------------------------------|---------------------------------------------------------|-----------------------------------------------|----------------------------------------------------------|-------------------------------------------|-------------------------------------------------|----------------------------------------------|------------------------------------------------|
|                      |                         |                                 | Better than target                                      |                                               | Between target and limit                                 |                                           |                                                 | Beyond limit                                 |                                                |
|                      |                         |                                 | 0                                                       | 0.5                                           | 1.0                                                      | 1.5                                       | 2.0                                             | 2.5                                          | 3.0                                            |
| • Sustainability     | • Aquaculture           | • Cultured / wild biomass ratio | Cultured biomass is extremely smaller than wild biomass | Cultured biomass is smaller than wild biomass | Cultured biomass is moderately smaller than wild biomass | Cultured biomass is average               | Cultured biomass is significant                 | Cultured biomass is highly significant       | Cultured biomass is the same as wild biomass   |
|                      | • Leisure activities    | • Catch by leisure              | Catch by leisure is extremely small                     | Catch by leisure is small                     | Catch by leisure is moderately small                     | Catch by leisure is average               | Catch by leisure is moderately large            | Catch by leisure is large                    | Catch by leisure is extremely large            |
|                      |                         | • Catch by tideland education   | Catch by tideland education is extremely small          | Catch by tideland education is small          | Catch by tideland education is moderately small          | Catch by tideland education is average    | Catch by tideland education is moderately large | Catch by tideland education is large         | Catch by tideland education is extremely large |
|                      | • Accident and disaster | • Predation by jellyfish        | Predation by jellyfish is extremely small               | Predation by jellyfish is negligible          | Predation by jellyfish is minor                          | Predation by jellyfish is moderate        | Predation by jellyfish is significant           | Predation by jellyfish is highly significant | Predation by jellyfish is extremely large      |
|                      |                         | • Predation by starfish         | Predation by starfish is extremely small                | Predation by starfish is negligible           | Predation by starfish is minor                           | Predation by starfish is moderate         | Predation by starfish is significant            | Predation by starfish is highly significant  | Predation by starfish is extremely large       |
|                      |                         | • Deaths by eutrophication      | Deaths by eutrophication never occurs                   | Deaths by eutrophication rarely occurs        | Deaths by eutrophication sometimes occurs                | Deaths by eutrophication averagely occurs | Deaths by eutrophication often occurs           | Deaths by eutrophication frequently occurs   | Deaths by eutrophication always occurs         |
|                      |                         |                                 |                                                         |                                               |                                                          |                                           |                                                 |                                              |                                                |

|                   |                                |                                                     |                                                                     |                                                           |                                                                                                                |                                                                                                |                                                                                                                              |                                                                                                                                       |                                                                                |
|-------------------|--------------------------------|-----------------------------------------------------|---------------------------------------------------------------------|-----------------------------------------------------------|----------------------------------------------------------------------------------------------------------------|------------------------------------------------------------------------------------------------|------------------------------------------------------------------------------------------------------------------------------|---------------------------------------------------------------------------------------------------------------------------------------|--------------------------------------------------------------------------------|
|                   |                                | • Deaths by oil pollution                           | Death by oil pollution is does not exist                            | Death by oil pollution is negligible                      | Death by oil pollution is minor                                                                                | Death by oil pollution is moderate                                                             | Death by oil pollution is significant                                                                                        | Death by oil pollution is highly significant                                                                                          | Death by oil pollution is catastrophic                                         |
|                   | • Stock enhancement activities | • Biomass enhancement by fries or juveniles release | Never release fries or juveniles in the area                        | A few release fries or juveniles in the area              | Release conducted once and small amount in recent X year ( X = generation period – age at release) on the area | Release conducted twice in recent X year ( X = generation period – age at release) on the area | Release conducted three times and considerable amount in recent X year ( X = generation period – age at release) on the area | Release conducted more than four times and considerable amount in recent X year ( X = generation period – age at release) on the area | Release conducted continuously and considerable amount in the most recent past |
| • Habitat quality | • Aquaculture                  | • Fish waste                                        | Amount of fish waste is extremely small                             | Amount of fish waste is small                             | Amount of fish waste is moderately small                                                                       | Amount of fish waste is average                                                                | Amount of fish waste is moderately large                                                                                     | Amount of fish waste is large                                                                                                         | Amount of fish waste is extremely large                                        |
|                   |                                | • Aquaculture debris                                | Aquaculture debris is extremely small                               | Aquaculture debris is small                               | Aquaculture debris is moderately small                                                                         | Aquaculture debris is considerable                                                             | Aquaculture debris is moderately large                                                                                       | Aquaculture debris is large                                                                                                           | Aquaculture debris is extremely large                                          |
|                   |                                | • Fish food waste                                   | Amount of fish food waste is extremely smaller than total fish food | Amount of fish food waste is smaller than total fish food | Amount of fish food waste is moderately smaller than total fish food                                           | Amount of fish food waste is average                                                           | Amount of fish food waste is significant                                                                                     | Amount of fish food waste is highly significant                                                                                       | Amount of fish food waste is the same as total fish food                       |
|                   |                                | • Water circulation                                 | Water circulation is always occurs                                  | Water circulation is frequently occurs                    | Water circulation is often occurs                                                                              | Water circulation is averagely occurs                                                          | Water circulation is sometimes occurs                                                                                        | Water circulation is rarely occurs                                                                                                    | Water circulation is never occurs                                              |

|  |                           |                              |                                                              |                                                                                 |                                                                               |                                                                               |                                                                               |                                                                               |                                                                               |
|--|---------------------------|------------------------------|--------------------------------------------------------------|---------------------------------------------------------------------------------|-------------------------------------------------------------------------------|-------------------------------------------------------------------------------|-------------------------------------------------------------------------------|-------------------------------------------------------------------------------|-------------------------------------------------------------------------------|
|  | • Land-based pollution    | • Domestic sewage            | Amount of domestic sewage is extremely small                 | Amount of domestic sewage is small                                              | Amount of domestic sewage is moderately small                                 | Amount of domestic sewage is average                                          | Amount of domestic sewage is moderately large                                 | Amount of domestic sewage is large                                            | Amount of domestic sewage is extremely large                                  |
|  |                           | • Domestic excreta           | Amount of domestic excreta is extremely small                | Amount of domestic excreta is small                                             | Amount of domestic excreta is moderately small                                | Amount of domestic excreta is average                                         | Amount of domestic excreta is moderately large                                | Amount of domestic excreta is large                                           | Amount of domestic excreta is extremely large                                 |
|  |                           | • Industrial sewage          | Amount of industrial sewage is extremely small               | Amount of industrial sewage is small                                            | Amount of industrial sewage is moderately small                               | Amount of industrial sewage is average                                        | Amount of industrial sewage is moderately large                               | Amount of industrial sewage is large                                          | Amount of industrial sewage is extremely large                                |
|  |                           | • Industrial organic matter  | Amount of industrial organic is extremely small              | Amount of industrial organic is small                                           | Amount of industrial organic is moderately small                              | Amount of industrial organic is average                                       | Amount of industrial organic is moderately large                              | Amount of industrial organic is large                                         | Amount of industrial organic is extremely large                               |
|  |                           | • Industrial heated effluent | Heated effluent temperature is the same as water temperature | Heated effluent temperature is higher than 0.5° compared with water temperature | Heated effluent temperature is higher than 1° compared with water temperature | Heated effluent temperature is higher than 2° compared with water temperature | Heated effluent temperature is higher than 4° compared with water temperature | Heated effluent temperature is higher than 6° compared with water temperature | Heated effluent temperature is higher than 8° compared with water temperature |
|  | • Construction activities | • Waste by construction      | Amount of waste by construction is extremely small           | Amount of waste by construction is small                                        | Amount of waste by construction is moderately small                           | Amount of waste by construction is average                                    | Amount of waste by construction is moderately large                           | Amount of waste by construction is large                                      | Amount of waste by construction is extremely large                            |
|  |                           | • Seabed-sand collection     | Seabed-sand collection activities are never occur            | Seabed-sand collection activities are rarely occur                              | Seabed-sand collection activities are sometimes occur                         | Seabed-sand collection activities are averagely occur                         | Seabed-sand collection activities are often occur                             | Seabed-sand collection activities are frequently occur                        | Seabed-sand collection activities are always occur                            |

|  |                         |                                                 |                                                          |                                                                      |                                                            |                                                                       |                                                              |                                                                       |                                                            |
|--|-------------------------|-------------------------------------------------|----------------------------------------------------------|----------------------------------------------------------------------|------------------------------------------------------------|-----------------------------------------------------------------------|--------------------------------------------------------------|-----------------------------------------------------------------------|------------------------------------------------------------|
|  |                         | • Shoreline change by reclamation               | Rate of shoreline change by reclamation is extremely low | Rate of shoreline change by reclamation is low                       | Rate of shoreline change by reclamation is moderately low  | Rate of shoreline change by reclamation is average                    | Rate of shoreline change by reclamation is moderately high   | Rate of shoreline change by reclamation is high                       | Rate of shoreline change by reclamation is extremely high  |
|  |                         | • Sediment inflow by reclamation                | Sediment inflow by reclamation is extremely small        | Sediment inflow by reclamation is small                              | Sediment inflow by reclamation is moderately small         | Sediment inflow by reclamation is average                             | Sediment inflow by reclamation is moderately large           | Sediment inflow by reclamation is large                               | Sediment inflow by reclamation is extremely large          |
|  | • Leisure activities    | • Waste by leisure activities                   | Amount of waste by leisure activities is extremely small | Amount of waste by leisure activities is small                       | Amount of waste by leisure activities is moderately small  | Amount of waste by leisure activities is average                      | Amount of waste by leisure activities is moderately large    | Amount of waste by leisure activities is large                        | Amount of waste by leisure activities is extremely large   |
|  |                         | • Heavy metal waste by leisure activities       | No heavy metal waste by leisure activities               | Amount of heavy metal waste by leisure activities is extremely small | Amount of heavy metal waste by leisure activities is small | Amount of heavy metal waste by leisure activities is moderately small | Amount of heavy metal waste by leisure activities is average | Amount of heavy metal waste by leisure activities is moderately large | Amount of heavy metal waste by leisure activities is large |
|  |                         | • Habitat physical damage by leisure activities | Habitat damage is extremely small                        | Habitat damage is negligible                                         | Habitat damage is minor                                    | Habitat damage is moderate                                            | Habitat damage is significant                                | Habitat damage is severe                                              | Damaged habitat condition is worst                         |
|  |                         | • Tideland habitat damage by tideland education | Tideland habitat damage is extremely small               | Tideland habitat damage is negligible                                | Tideland habitat damage is minor                           | Tideland habitat damage is moderate                                   | Tideland habitat damage is significant                       | Tideland habitat damage is severe                                     | Damaged habitat is worst                                   |
|  | • Accident and disaster | • Global warming by climate change              | SST difference from the common state is extremely small  | SST difference from the common state is small                        | SST difference from the common state is moderately small   | SST difference from the common state is average                       | SST difference from the common state is moderately large     | SST difference from the common state is large                         | SST difference from the common state is extremely large    |

|  |  |                                         |                                                                                                    |                                                                                          |                                                                                                |                                                                                                |                                                                                                    |                                                                                      |                                                                                               |
|--|--|-----------------------------------------|----------------------------------------------------------------------------------------------------|------------------------------------------------------------------------------------------|------------------------------------------------------------------------------------------------|------------------------------------------------------------------------------------------------|----------------------------------------------------------------------------------------------------|--------------------------------------------------------------------------------------|-----------------------------------------------------------------------------------------------|
|  |  | • Ocean acidification by climate change | PH difference from the common state is extremely small                                             | PH difference from the common state is small                                             | PH difference from the common state is moderately small                                        | PH difference from the common state is average                                                 | PH difference from the common state is moderately large                                            | PH difference from the common state is large                                         | PH difference from the common state is extremely large                                        |
|  |  | • Eutrophication (red tide occurrence)  | Eutrophication (red tide) never occurs                                                             | Eutrophication (red tide) rarely occurs                                                  | Eutrophication (red tide) sometimes occurs                                                     | Eutrophication (red tide) averagely occurs                                                     | Eutrophication (red tide) often occurs                                                             | Eutrophication (red tide) frequently occurs                                          | Eutrophication (red tide) always occurs                                                       |
|  |  | • Whitening event                       | Whitening event never occurs                                                                       | A rate of whitening event area per unit area is smaller than 5%                          | A rate of whitening event area per unit area is smaller than 10%                               | A rate of whitening event area per unit area is smaller than 15%                               | A rate of whitening event area per unit area is smaller than 20%                                   | A rate of whitening event area per unit area is smaller than 25%                     | A rate of whitening event area per unit area is smaller than 30%                              |
|  |  | • Water runoff by storm                 | Water runoff by storm is extremely small                                                           | Water runoff by storm is small                                                           | Water runoff by storm is moderately small                                                      | Water runoff by storm is average                                                               | Water runoff by storm is moderately large                                                          | Water runoff by storm is large                                                       | Water runoff by storm is extremely large                                                      |
|  |  | • Oil pollution by ship accident        | There is no pollution on fisheries or No oil spillage accident                                     | There is a few pollution on fisheries                                                    | There is some pollution on the fisheries                                                       | There is considerable pollution on the fisheries                                               | There is much pollution on the fisheries                                                           | Existence of oil spillage accident within recent 3-5years                            | Existence of oil spillage accident within recent 3years                                       |
|  |  | • Oxygen deficient event                | Oxygen deficient event is never occur                                                              | Oxygen deficient event rarely occurs                                                     | Oxygen deficient event sometimes occurs                                                        | Oxygen deficient event averagely occurs                                                        | Oxygen deficient event often occurs                                                                | Oxygen deficient event frequently occurs                                             | Oxygen deficient event always occurs                                                          |
|  |  | • Typhoon event                         | Typhoon is frequently occurs<br><br>and<br><br>amount of waste inflow from land is extremely small | Typhoon is frequently occurs<br><br>and<br><br>amount of waste inflow from land is small | Typhoon is often occurs<br><br>and<br><br>amount of waste inflow from land is moderately small | Typhoon is averagely occurs<br><br>and<br><br>amount of waste inflow from land is considerable | Typhoon is sometimes occurs<br><br>and<br><br>amount of waste inflow from land is moderately large | Typhoon is rarely occurs<br><br>and<br><br>amount of waste inflow from land is large | Typhoon is never occurs<br><br>and<br><br>amount of waste inflow from land is extremely large |

|                |                                |                                            |                                                                                           |                                                                                   |                                                                                               |                                                                                           |                                                                                            |                                                                                 |                                                                                           |
|----------------|--------------------------------|--------------------------------------------|-------------------------------------------------------------------------------------------|-----------------------------------------------------------------------------------|-----------------------------------------------------------------------------------------------|-------------------------------------------------------------------------------------------|--------------------------------------------------------------------------------------------|---------------------------------------------------------------------------------|-------------------------------------------------------------------------------------------|
|                | • Stock enhancement activities | • Artificial reefs deployment              | Artificial reefs deployment is never occur                                                | The number of artificial reefs per unit area is extremely small                   | The number of artificial reefs per unit area is small                                         | The number of artificial reefs per unit area is moderately small                          | The number of artificial reefs per unit area is average                                    | The number of artificial reefs per unit area is moderately large                | The number of artificial reefs per unit area is large                                     |
| • Biodiversity | • Aquaculture                  | • Attracted fish amount by uneaten food    | Amount of uneaten feed is extremely smaller than total feed                               | Amount of uneaten feed is smaller than total feed                                 | Amount of uneaten feed is moderately smaller than total feed                                  | Amount of uneaten feed is average                                                         | Amount of uneaten feed is significant                                                      | Amount of uneaten feed is highly significant                                    | Amount of uneaten feed is the same as total feed                                          |
|                |                                | • Escaped cultured species                 | Amount of escaped cultured species is extremely smaller than total cultured species (<5%) | Amount of escaped cultured species is smaller than total cultured species (5~10%) | Amount of escaped cultured species is moderately smaller than total cultured species (10~20%) | Amount of escaped cultured species is average (20~30%)                                    | Amount of escaped cultured species is significant (30~40%)                                 | Amount of escaped cultured is highly significant (40~50%)                       | Amount of escaped cultured species is extremely large (>50%)                              |
|                |                                | • Death of wild fish due to disease spread | A rate of death of wild fish by disease spread is extremely lower than natural mortality  | A rate of death of wild fish by disease spread is lower than natural mortality    | A rate of death of wild fish by disease spread is moderately lower than natural mortality     | A rate of death of wild fish by disease spread is average compared with natural mortality | A rate of death of wild fish by disease spread is moderately higher than natural mortality | A rate of death of wild fish by disease spread is higher than natural mortality | A rate of death of wild fish by disease spread is extremely higher than natural mortality |
|                | • Land-based pollution         | • Ballast water discharge                  | Amount of discharged ballast water is extremely small                                     | Amount of discharged ballast water is small                                       | Amount of discharged ballast water is moderately small                                        | Amount of discharged ballast water is average                                             | Amount of discharged ballast water is moderately large                                     | Amount of discharged ballast water is large                                     | Amount of discharged ballast water is extremely large                                     |
|                | • Accidents and disasters      | • Jellyfish bloom                          | Jellyfish bloom always occurs                                                             | Jellyfish bloom frequently occurs                                                 | Jellyfish bloom often occurs                                                                  | Jellyfish bloom averagely occurs                                                          | Jellyfish bloom sometimes occurs                                                           | Jellyfish bloom rarely occurs                                                   | Jellyfish bloom never occurs                                                              |
|                |                                | • Starfish bloom                           | Starfish bloom always occurs                                                              | Starfish bloom frequently occurs                                                  | Starfish bloom often occurs                                                                   | Starfish bloom averagely occurs                                                           | Starfish bloom sometimes occurs                                                            | Starfish bloom rarely occurs                                                    | Starfish bloom never occurs                                                               |

|                           |                           |                                                              |                                                                                                               |                                                                                                     |                                                                                                                |                                                                                             |                                                                                                                 |                                                                                                      |                                                                                                                |
|---------------------------|---------------------------|--------------------------------------------------------------|---------------------------------------------------------------------------------------------------------------|-----------------------------------------------------------------------------------------------------|----------------------------------------------------------------------------------------------------------------|---------------------------------------------------------------------------------------------|-----------------------------------------------------------------------------------------------------------------|------------------------------------------------------------------------------------------------------|----------------------------------------------------------------------------------------------------------------|
| • Socio-economic benefits | • Leisure activities      | • Extra income from supporting leisure activities            | Extra income is extremely larger than minimum living cost                                                     | Extra income is larger than minimum living cost                                                     | Extra income is moderately larger than minimum living cost                                                     | Extra income is average compared with minimum living cost                                   | Extra income is moderately smaller than minimum living cost                                                     | Extra income is smaller than minimum living cost                                                     | Extra income is extremely smaller than minimum living cost                                                     |
|                           |                           | • Extra employment rate by leisure activities                | Extra employment rate by leisure activities is extremely high compared with capture fisheries employment rate | Extra employment rate by leisure activities is high compared with capture fisheries employment rate | Extra employment rate by leisure activities is moderately high compared with capture fisheries employment rate | Extra employment rate by leisure activities is similar to capture fisheries employment rate | Extra employment rate by leisure activities is moderately small compared with capture fisheries employment rate | Extra employment rate by leisure activities is small compared with capture fisheries employment rate | Extra employment rate by leisure activities is extremely small compared with capture fisheries employment rate |
|                           | • Accidents and disasters | • Fishing gear damage or ship damage by accident or disaster | Damaged fishing gear or ship is optimal condition                                                             | Fishing gear damage or ship damage is negligible                                                    | Fishing gear damage or ship damage is minor                                                                    | Fishing gear damage or ship damage is moderate                                              | Fishing gear damage or ship damage is major                                                                     | Fishing gear damage or ship damage is severe                                                         | Fishing gear damage or ship damage is worst                                                                    |
